# Supplementary material for: The European Respiratory Society led training programme improves self-reported competency and increases the use of thoracic ultrasound
Source: PubMed Central journal article supplement — Breathe (Sheff). 2024 Jan 16;19(4):230160. doi: 10.1183/20734735.0160-2023 (PMC10805265; doi:10.1183/20734735.0160-2023), 2024-01-16
Supplement: EDU-0160-2023.supplement.pdf [file EDU-0160-2023.supplement.pdf]

ID: \_\_\_\_\_

Age: \_\_\_\_\_

Country: \_\_\_\_\_

**Gender:**

- Female
- Male
- Other

**When did you attend the ERS thoracic ultrasound course part 2 (month and year):**

\_\_\_\_\_

**Education**

- Physician not yet under specialization
- Under specialization (year: \_\_\_\_\_)
- Specialized physician
- Nurse
- Other: \_\_\_\_\_

**Specialty:**

- Respiratory Medicine
- Emergency Medicine
- Cardiology
- Thoracic surgery
- Other: \_\_\_\_\_

**How often have you performed thoracic ultrasound within the last 3 months**

- Several times every workweek
- Once or twice every workweek
- Once or twice monthly
- Less often
- Never

**Where and when do you use it (you can pick more than one):**

- Outpatient clinic
- Emergency Department
- Respiratory Department (hospitalized patients)
- Prehospital
- Endoscopic suite
- Other: \_\_\_\_\_

**Which patient categories are you scanning**

- Patients with suspected pulmonary infections
- Patients with suspected pleural effusion
- Patients with suspected cardiac disease
- Patients with suspected pneumothorax
- Patients with general dyspnoea where no differential diagnosis has been made
- Other: \_\_\_\_\_

**Do you perform other point-of-care ultrasound examinations (heart, abdominal, DVT)**

- Yes
- No

**How would you rate your technical thoracic ultrasound skills? (execution of the ultrasound examination)**

- Very poor
- Poor
- Fair
- Good
- Very good

**How would you rate your overall thoracic ultrasound competence (including technical execution, interpretation, diagnostics)**

- Very poor
- Poor
- Fair
- Good
- Very good
